# Supplementary material
Source: Springer Nature journal article supplement (https://www.springermedizin.de/resource/supplementary/13013_2006_28_MOESM2_ESM.pdf/9631056)

### A. Direction

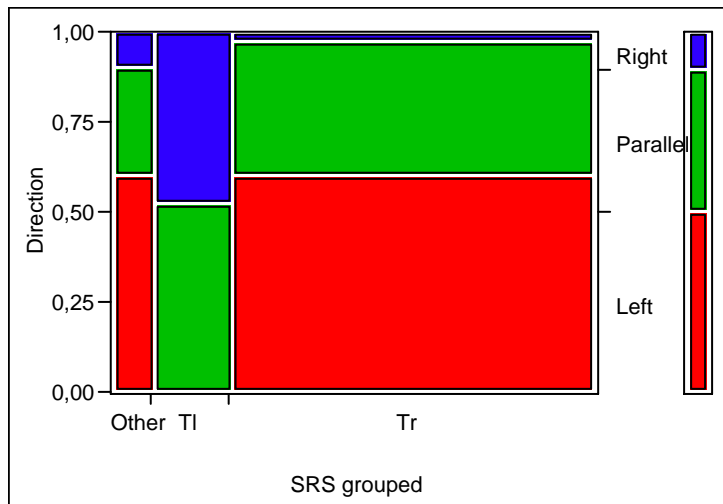

### C. Frontal Shift

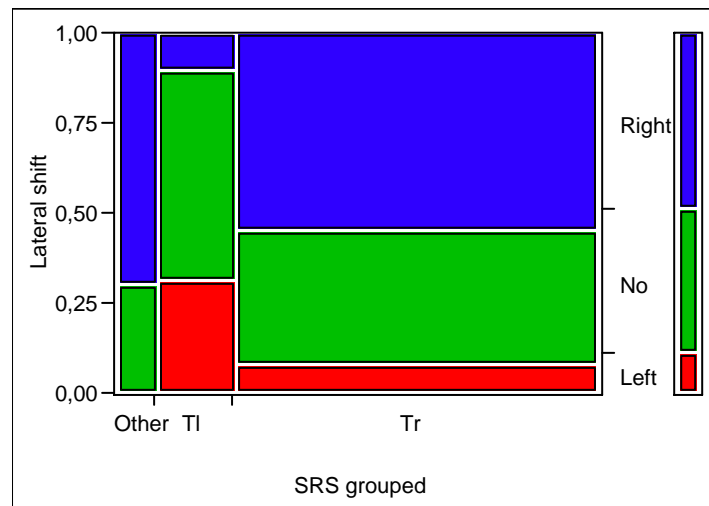

### B. Sagittal Shift

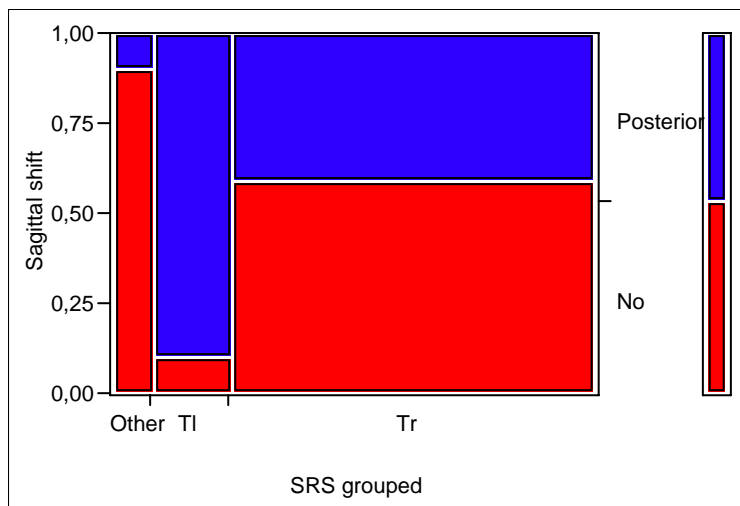

### D. Phase

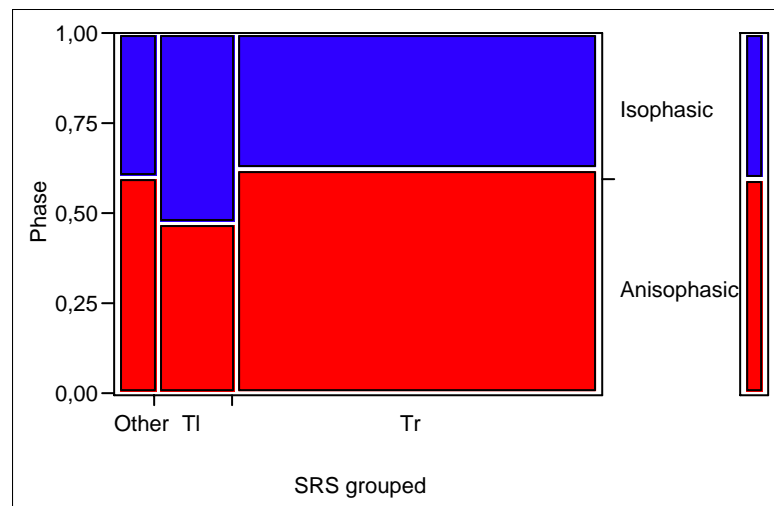

Supplement: MOESM2 [file 9631056]
